1 **Chihiro Furumizu,<sup>a</sup> Anders K. Krabberød,<sup>b</sup> Marta Hammerstad,<sup>c</sup> Renate M.**  
 2 **Alling,<sup>b</sup> Mari Wildhagen,<sup>b</sup> Shinichiro Sawa,<sup>a,1</sup> and Reidunn B. Aalen<sup>b,2</sup>**

3 <sup>a</sup> Graduate School of Science and Technology, Kumamoto University, Kumamoto,  
 4 Japan.

5 <sup>b</sup> Section for Evolutionary Biology and Genetics, Department of Biosciences,  
 6 University of Oslo, Norway

7 <sup>c</sup> Section for Biochemistry and Molecular Biology, Department of Biosciences,  
 8 University of Oslo, Norway

9

10

11

12

13 Contact information:

14 <sup>1</sup> [sawa@kumamoto-u.ac.jp](mailto:sawa@kumamoto-u.ac.jp).

15 <sup>2</sup> [reidunn.aalen@ibv.uio.no](mailto:reidunn.aalen@ibv.uio.no)

16

17 Corresponding author:

18 Reidunn B. Aalen

19

20 **The Sequenced Genomes of Non-Seed Land Plants Reveal the (R)Evolutionary**  
 21 **History of Peptide Signaling**

22 **Short title**

23 **(R)Evolutionary Peptide Signaling History**

24

25 The author(s) responsible for distribution of materials integral to the findings  
 26 presented in this article in accordance with the policy described in the Instructions for

27 Authors ([www.plantcell.org](http://www.plantcell.org)) are: Reidunn B. Aalen ([reidunn.aalen@ibv.uio.no](mailto:reidunn.aalen@ibv.uio.no)) and

28 Chihiro Furumizu ([furumizu@kumamoto-u.ac.jp](mailto:furumizu@kumamoto-u.ac.jp)).

29

## 30           **Abstract**

31   An understanding of land plant evolution is a prerequisite for in-depth knowledge of  
 32   plant biology. Here we illustrate how to extract and explore information hidden in the  
 33   increasing number of sequenced plant genomes, from bryophytes to angiosperms, to  
 34   elucidate a specific biological question – how peptide signaling evolved. To conquer  
 35   land and cope with changing environmental conditions, plants have gone through  
 36   profound transformations that must have required a revolution in cell-to-cell  
 37   communication. Peptides can act as signals of endogenous and exogenous changes,  
 38   and interactions with leucine-rich repeat receptor-like kinases activate intracellular  
 39   molecular signaling. Signaling peptides are typically active in organs like flowers and  
 40   seeds, vascular tissue, root and shoot meristems, which are absent in the most  
 41   primitive land plants. However, putative orthologues for several peptide-receptor  
 42   pairs have been identified in non-seed land plants. These discoveries and  
 43   elucidation of co-evolution of such ligands and their receptors, have profound  
 44   implications for the understanding of evolution and diversity of cell-to-cell  
 45   communication, as *de novo* interactions in peptide signaling pathways may have  
 46   contributed to generate novel traits in land plants. Phylogenetic analyses, genomic,  
 47   structural and functional data can guide us to reveal evolutionary steps that laid the  
 48   foundation for a wealth of diversified terrestrial plants.

49

## 50 Introduction

51 Land plants have evolved from a class of unicellular freshwater green algae that  
 52 started to colonize land ~ 470 million years ago (Mya) (Delwiche and Cooper, 2015;  
 53 Ishizaki, 2017). This successful evolution has required groundbreaking biological  
 54 innovations, such as the transition from the ancestral haploid unicellular life style of  
 55 the algae to multicellular plants with alternating haploid and diploid generations, and  
 56 development of new specialized organs (Figure 1). While the diploid sporophyte and  
 57 the haploid gametophyte initially might have employed the same genes, gene  
 58 duplications followed by neofunctionalization likely facilitated the development of a  
 59 multicellular shoot apical meristem (SAM) in the polysporangiate sporophytes, a  
 60 transition that necessitated extensive changes in gene expression patterns (Ligrone  
 61 et al., 2012). Lycophytes and ferns, which appeared ~410 Mya (Gensel, 2008;  
 62 Kenrick and Crane, 1997; Steemans et al., 2009), are extant plants representing  
 63 early diverging lineages with vasculature, which provided mechanical support and  
 64 transport of nutrients (Ishizaki, 2017). The fossil record suggests that during the  
 65 Devonian period (400 - 360 Mya) roots evolved from shoots, and provided  
 66 anchorage for the plants and allowed acquisition of water and nutrients from the soil.

67 Evolution of novel cell types, tissue types, and organs with increasing multicellular  
 68 complexity, must have put a high demand on cell-to-cell communication in land  
 69 plants. Recent advances in whole genome sequencing have facilitated large-scale  
 70 comparative genomic studies in bryophytes, lycophytes, ferns, gymnosperms,  
 71 angiosperms, and streptophyte algae, and identified genes that were lost or acquired  
 72 during land plant evolution (Amborella Genome, 2013; Banks et al., 2011; Bowman  
 73 et al., 2017; Li et al., 2018; Nystedt et al., 2013; Rensing et al., 2008). The ancestry  
 74 of several hormone and stress signaling pathways in land plants has for instance  
 75 been traced back to algae (de Vries et al., 2018; Nishiyama et al., 2018).

76 Small peptides interacting with plasma-membrane bound receptor-like kinases  
 77 (RLKs) have recently challenged the position of the classical hormones as the major  
 78 mediators of signaling processes (Grienenberger and Fletcher, 2015). The liverwort  
 79 *Marchantia polymorpha*, the moss *Physcomitrella patens*, and the lycophyte  
 80 *Selaginella moellendorffii*, together representing the present-day descendants of the  
 81 earliest land plants, as well as *Amborella trichopoda*, representing the earliest

**Figure 1. Phylogenetic distribution of small post-translationally modified peptides in land plants.**

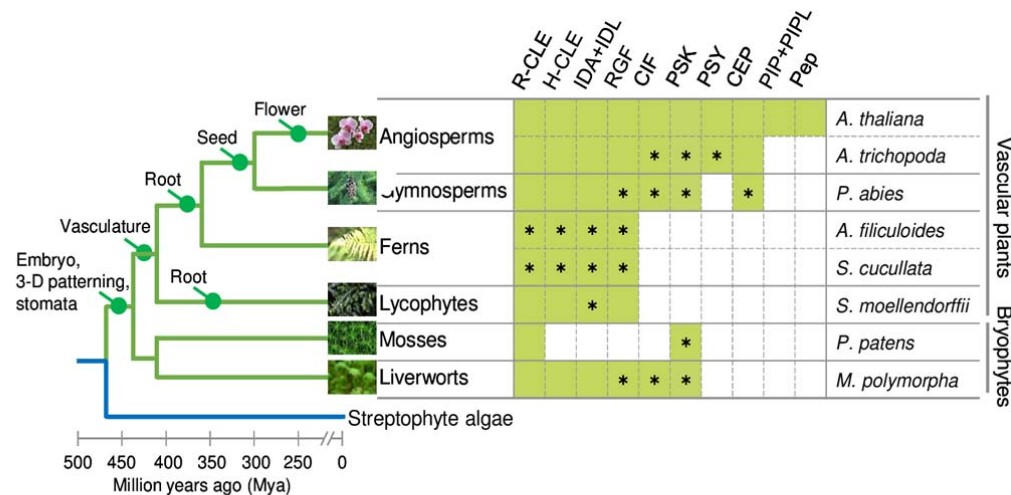

Left: Simplified phylogenetic tree of major extant land plant lineages (green lines) based on (One Thousand Plant Transcriptomes, 2019). The branch lengths are roughly proportional to the estimated divergence dates (Chang et al., 2016). Gains of key morphological innovations are shown as green circles mapped on the tree while some gain events are still under discussion. Right: Colored boxes indicate the presence of homologues of the indicated small post-translationally modified signaling peptides for the model plants *Arabidopsis thaliana* (Lamesch et al., 2012), *Amborella trichopoda* (Amborella Genome, 2013), *Picea abies* (Nystedt et al., 2013), *Azolla filiculoides* and *Salvinia cucullata* (Li et al., 2018), *Selaginella moellendorffii* (Banks et al., 2011), *Physcomitrella patens* (Lang et al., 2018), and *Marchantia polymorpha* (Bowman et al., 2017). Asterisks indicate putative peptides newly identified in our sequence analyses. Blank boxes indicate that respective peptide homologues were not detected in our analyses. Except for *M. polymorpha*, images represent each taxa and are from Pixabay (<https://pixabay.com>).

#### Image source

Pixabay (<https://pixabay.com>)

Orchid, Sunflower, *Picea abies*: Image by Goran Horvat from Pixabay

<https://pixabay.com/photos/orchid-orchidaceae-phalenopsis-3567929/>

<https://pixabay.com/photos/agriculture-sunflowers-bloom-flower-4351480/>

<https://pixabay.com/photos/picea-abies-european-spruce-cone-4396763/>

Fern: Image by pasja1000 from Pixabay

<https://pixabay.com/photos/fern-green-leaf-ferns-fresh-4179359/>

Selaginella: Image by Nika Akin from Pixabay

<https://pixabay.com/photos/fern-leaves-nature-environment-4662759/>

Star moss: Image by cocoparisienne from Pixabay

<https://pixabay.com/photos/moss-star-moss-forest-plant-2683009/>

*M. polymorpha*: Chihiro

82 flowering plants, have newly been established as models that can help us  
83 understand the evolution of land plants. Recent phylogenetic analyses have

84 identified RLKs that likely bind peptides in these species, but not detected in the  
85 sequenced algae genomes (Liu et al., 2017). The question therefore arises as to  
86 whether the appearance of peptide ligands, their receptors and components of their  
87 signaling pathways, can be linked to cell-to-cell communication pathways that  
88 facilitated the evolution of land plants and their adaptive strategies to terrestrial  
89 environments.

90 A number of papers have reviewed specific peptide or receptor families involved in  
91 peptide signaling (Fernandez et al., 2013; Kaufmann and Sauter, 2019; Muschietti  
92 and Wengier, 2018; Oh et al., 2018; Segonzac and Monaghan, 2019; Shi et al.,  
93 2019; Taleski et al., 2018); and references listed for Table 1 (see Supplemental  
94 Table 1). Our perspective offers cross comparison of multiple peptide ligand-receptor  
95 pairs and argues that cell-to-cell communication through peptide signaling pathways  
96 needs to be studied in an integrative manner, combining both *in silico* and  
97 experimental approaches, if we are to understand their (r)evolutionary history and  
98 importance. With emphasis on leucine-rich repeat (LRR) RLKs interacting with small  
99 post-transcriptionally modified peptides (PTMPs) (Table 1A), we highlight emerging  
100 ideas and issues elucidating the evolution of peptide signaling systems.

## 101 **LRR-RLKs and post-transcriptionally modified peptides (PTMP) evolved with** 102 **the land plants**

103 Since the first discovery of a small signaling peptide in plants (Pearce et al., 1991),  
104 increase in the number and quality of sequenced genomes, as well as advances in  
105 methods for *in silico* annotation of small genes, have allowed identification of a  
106 substantial number of potential plant signaling peptides (Ghorbani et al., 2015; Goad  
107 et al., 2017; Gong et al., 2002; Tavormina et al., 2015). They can be divided into two  
108 major groups, the cysteine-rich peptides (CRPs) (Table 1B), which attain their 3D  
109 structure by disulfide bridges formed between pairs of cysteines, and the PTMPs,  
110 generated from prepropeptides and processed to mature peptides of 5-20 amino  
111 acids (Table 1A). The majority of both classes of peptides signal through plasma-  
112 membrane-bound receptors with cytoplasmic serine/threonine kinase domains and  
113 ligand-binding ectodomains built of leucine-rich repeats (LRRs) (Shiu and Bleecker,  
114 2001). In *Arabidopsis thaliana* (Arabidopsis), peptides and LRR-RLKs are crucial  
115 players in developmental and physiological processes, and in adaptation to

environmental changes and challenges (de Bang et al., 2017; Olsson et al., 2019). The recently sequenced genomes of algae species, bryophytes, lycophytes, ferns, gymnosperms and basal angiosperms, and the identification of numerous bryophyte and lycophyte LRR-RLKs (Amborella Genome, 2013; Banks et al., 2011; Bowman et al., 2017; Liu et al., 2016; Nishiyama et al., 2018; Rensing et al., 2008) facilitate investigations of both the evolution of various biological processes, and the importance of peptide signaling for the overwhelming diversity of land plants. A crucial question is whether bryophytes or lycophytes have LRR-RLKs orthologues with homologous or analogous functions as in *Arabidopsis* and other angiosperms. To address this question, it is not only necessary to identify orthologues of peptides and receptors in the descendants of the earliest land plants, but also to substantiate that their ancestral versions could have functioned as signaling ligand-receptor pairs.

More than 200 LRR-RLKs in *Arabidopsis* have been assigned to subfamilies according to their unique structure, organization and number of LRRs (Shiu and Bleecker, 2001). To date, RLKs of the LRR X, XI, and XIII subfamilies have been identified as receptors for endogenous small signaling peptides. Among them, subfamily X receptors are unique in the chemical diversity of their ligands; they interact with CRPs and PTMPs as well as steroid plant hormones, the brassinosteroids (Kutschera and Wang, 2012; Yokota et al., 2017). In contrast, ERECTA (ER) and ER-LIKE (ERL) receptors are the only known peptide receptors of the LRR XIII. ER/ERL receptors bind CRPs named EPIDERMAL PATTERNING FACTOR (EPF) and EPF-LIKE (EPFL), and in angiosperms, the EPF/EPFL–ER/ERL signaling controls stomatal patterning. Stomata have been identified in fossil records of extinct plants and all extant land plant lineages except for the liverworts (Peterson et al., 2010). Evolution of stomata was a major step in the adaptation of plants to a terrestrial life, as stomata enable the plant to control the water balance and thereby survive in the dry atmosphere. The conserved EPF signaling components are involved in stomatal patterning in *P. patens*, which support the proposed monophyletic origin of stomata or, alternatively, independent recruitment of the same module in analogous systems (Caine et al., 2016; Chater et al., 2017; Harris et al., 2020). Either way, these experiments demonstrate that comparative studies of peptide signaling can give valuable insight into the molecular basis of cell-to-cell communication in the evolution of a complex organ.

Tracing the evolutionary trajectory of the subclasses X and XIII will be an exciting future challenge for understanding the emergence of new ligand-receptor pairs. Here, however, we will focus on the PTMPs, which - with a few exceptions - all signal through subfamily XI receptors with >20 LRRs.

Both peptide ligands and LRR-RLKs can be assigned to small gene families (Table 1). Genetic and biochemical studies suggest that members of a given peptide family bind and activate a subset of phylogenetically related receptors (Butenko et al., 2009). The necessity of molecular interaction between signaling peptides and their receptors must have set mutual constraints on mutational changes of amino acids with properties and location directly needed for binding and activation of receptors. The selective pressure on mutations in a LRR-RLK gene could potentially differ between the kinase domain, which determines the outcome of receptor activation, and the ectodomain, where a set of amino acid residues determine the ability to bind peptides. To explore this possibility, the phylogeny of the LRR ectodomains and of the kinase domains of subclass XI LRR-RLKs - from extant representatives of the earliest diverged lineages (liverworts, mosses, and lycophytes) to representatives of monocot and dicot angiosperms - were analyzed separately (see Supplemental material and methods).



167 The dual phylogenetic analyses also included algal sequences as outgroup (Figure  
168 2A). Interestingly, membrane-anchored LRR proteins, however without kinase  
169 domain, were found present in the tiny freshwater algae *Micromonas* (Worden et al.,  
170 2009), and kinase domains without LRR ectodomains were identified in *Volvox* (Matt  
171 and Umen, 2016) and *Chlamydomonas reinhardtii* (Salomé and Merchant, 2019).  
172 The *Micromonas* LRR proteins have more than 20 highly similar repeats, with  
173 conserved leucine residues positioned similarly to those of angiosperm LRRs,  
174 although with a repeat-unit of 23 amino acids, not 24 as found in land plants



**Figure 2. Phylogenetic analysis of the LRR-RLK subclass XI, with independent analysis of the LRR domain and the kinase domain.**

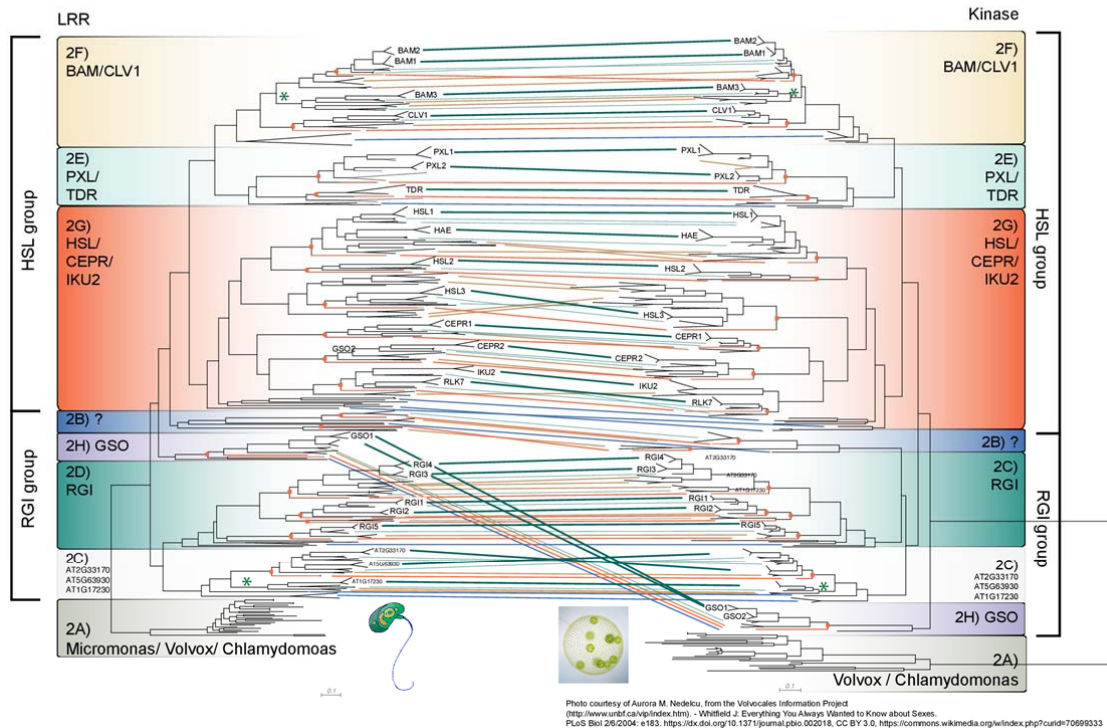

Tanglegram of the LRR-RLK subclass XI, with independent phylogenetic analysis of the LRR-domain (left) and the kinase domain (right) with lines connecting the domains for each gene. A) Micromonas, Volvox and Chlamydomonas sequences of LRR proteins or kinases were used as outgroups. B) These LRR-RLKs have no orthologue in Arabidopsis and are without known ligands and functions. C) These LRR-RLKs are without known ligands and functions. D) The RGI LRR-RLKs have evolved by several duplications, some specific for the eudicots. E) The TDF/POXY LRR and kinase trees differ with respect to the phylogeny of eudicot and monocot PXL1 and PXL2. F) The BAM/CLV LRR and kinase trees differ with respect to the phylogeny of eudicot and monocot BAM1 and BAM2. G) The HSL/CEPR/IKU LRR and kinase trees differ with respect to the phylogeny of eudicot and monocot HSL1, CEPR and IKU/RLK7. H) The GSO kinase domain group with the RGIs, and the LRR with the HSLs.

The LRR and kinase domain of receptors from early-diverging land plants (*S. moellendorffii*, *P. patens* and *M. polymorpha*) are connected with dark blue lines; the primitive angiosperm *A. trichopoda* with orange lines, monocots with brown lines; dicots, including Arabidopsis, with dark green lines; and other eudicots in light green. Common origins of *A. trichopoda* of and eudicots marked with orange squares and presumed losses in *A. trichopoda* are marked in green. A detailed version of this figure, with species and gene names is found as Supplemental Figure 2.

(Supplemental Figure 1). Searches for signaling peptides in algae, have so far not given any solid evidence (Goad et al., 2017; Oelkers et al., 2008), suggesting that known signaling peptides evolved after the divergence of land plants from ancestral algae. Consistent with this, we were not able to identify any gene encoding >20 LRRs coupled to a kinase domain in the recently sequenced genome of the algae *Chara braunii*, which is one of the closest relatives to land plants (Nishiyama et al., 2018).

Thus, the combination of long LRRs and kinase domains may seem to be an invention that facilitated the evolution of land plants. Additional sequenced genomes from early-diverging land plants may be needed to unravel the early evolutionary history of LRR-RLKs.

## **LRRs and the kinase domains have different evolutionary rate**

The LRR-RLKs of subclass XI represent the major receptor class that interacts with PTMPs (Bowman et al., 2017). (Figure 2, and with all details Supplemental Figure 2). The dual phylogenetic analyses (see Supplemental Methods) of members of this subclass consistently demonstrate that branches are longer for ectodomains than kinase domains (Supplemental Figure 2), implying that the LRRs have evolved faster than the kinase domains. This is likely due to the differential structural and functional requirements facing the respective domains. The LRRs need a structural scaffold guaranteed by the repeated leucines, and additionally amino acid residues involved in peptide recognition. As the peptide ligands vary in sequence and length, the LRR must have sequence differences adapted to their specific ligand. The varying length of the LRR domain is contributing to the observed difference in branch lengths between the two phylogenies. The shorter branches for the kinase domain may on the other hand reflect a need for preservation of an overall structure to secure the kinase activity.

The identification of XI type LRR-RLKs receptor sequences from the descendants of early-diverging land plant lineages, *M. polymorpha*, *P. patens* and *S. moellendorffii*, indicate that a diversification took place very early in land plant evolution, with separation of LRR-RLK XI into seven clades already in the common ancestor of bryophytes and vascular plants (Figure 2, dark blue lines). *Amborella trichopoda*, currently accepted as the most basal flowering plant (Soltis et al., 2008) was included in the analyses as a landmark for identification of evolutionary changes that took place before and after the emergence of angiosperms. The positions of the *A. trichopoda* receptors in the tree visualize that the number of LRR-RLK XI increased further in the angiosperms, and especially in the eudicot lineage (Figure 2, green lines), associated with whole genome duplication and later genome fractionation (Clark and Donoghue, 2018). The phylogenetic analysis also indicates that some of

the receptor genes originally duplicated in the ancestor of vascular plants have been lost in *A. trichopoda*, but have been retained in eudicots (Figure 2, green asterisks).

There are two major groups, here named the RGI and HSL after the ROOT GROWTH FACTOR INSENSITIVE (RGI)/RGF RECEPTOR (RGFR) and the HAESA-LIKE (HSL) receptors, respectively. These groups are further divided into clades which – with the exception for one clade without Arabidopsis homologues (Figure 2B, marked “?”) – are characterized by their orthologues in *A. thaliana*. Of these, one clade (Figure 2C) in the RGI major group, encompass three Arabidopsis genes (At2g33170, At5g63930 and A1g17230) with neither known ligands nor known functions, and multivalent mutants may be needed to obtain lines with informative mutant phenotypes. *A. trichopoda*, has one copy of this gene, but the phylogenetic analysis suggest that one copy was lost early in *A. trichopoda* (Figure 2C, green asterisk). The closest sister to this clade is the RGI clade (Figure 2D). The phylogenetic relationship between the five Arabidopsis RGI genes, the four copies in *A. trichopoda*, and two in monocot species suggests that the RGI branch was divided in two groups prior to angiosperm evolution: one represented by RGI5 and the other encompassing RGI1-4.

This conclusion was substantiated by inclusion of a gymnosperm (Norway spruce, *Picea abies*) and ferns (duckweed, *Azolla filiculoides*, and buce plant, *Salvinia cucullata*) in the analyses, which demonstrated the presence of two presumptive RGI orthologues also in these species (Supplemental Figure 3), suggesting a gene duplication took place before the divergence of ferns and seed plants. Especially the RGI1-4 group shows expansion through gene duplications. It's not clear whether monocots lost RGI homologues in their evolution or independent gene duplication took place during the evolution of basal angiosperms.

The other major group is comprised of three subclades, represented by HSL receptors, TDIF RECEPTOR (TDR)/PHLOEM INTERCALATED WITH XYLEM (PXY), and BARELY ANY MERISTEM (BAM)/CLAVATA1 (CLV1) receptors. TDR/PXY and BAM/CLV receptors form a clade distinct from that of HSL receptors. The phylogenetic analyses suggest that an ancestral BAM gene was duplicated first to give rise to the TDR/PXY sub-branch, which before the appearance of the

angiosperms gave rise to a *PXY-LIKE* (*PXL*) gene, which duplicated into *PXL1* and *PXL2* in the eudicot lineage (Figure 2E). In parallel *BAM* gave rise to *CLV1* and *BAM3* (Figure 2F), and finally during the development of the angiosperms, *BAM2*. Receptors similar to *CLV1* have been identified in both *P. patens* and *M. polymorpha* whereas *PXY/TDR*-related sequences are found in *M. polymorpha* but not in *P. patens*. The branch pattern suggests that the ancestor of *A. trichopoda* lost the gene leading to *BAM3* in eudicots (Figure 2F, green asterisk). A similar conclusion can be drawn for the dicot *PXL*. Moreover, the phylogenetic analyses of the *BAM3* LRR placed it closer to the other *BAMs*, while the kinase domain of *BAM3* seems closer to *CLV1*.

Within the *HSL* subclade (Figure 2G), gene duplications and diversification gave rise to two branches, one with *HSL* genes, and the other that includes *CEP RECEPTORS* (*CEPRs*). In the latter, the eudicot lineage experienced a recent gene duplication that generated *HAIKU2* (*IKU2*) and *RECEPTOR-LIKE KINASE7* (*RLK7*) in Arabidopsis. While *RLK7* is involved in innate immunity, *IKU2*, with its expression in pollen, during early endosperm and embryo development, and involvement in regulation of seed size in Arabidopsis (Luo et al., 2005), may have been recruited to regulate truly angiosperm- or eudicot-specific characters (Friedman and Williams, 2004). Interestingly, in the *A. trichopoda* genome there are small clusters of *LRR-RLK* genes (Liu et al., 2016), one of which encodes ancestral versions of *HSL* clade receptors, namely *BAM1*, *CEPR1*, *HSL2*, and a common ancestor for *IKU2* and *RLK7* in proximity (Figure 3). Reshuffling of the *A. trichopoda* genome has moved *CEPR1* and *IKU2/RLK7* away, leaving only *BAM1* and *HSL2* as neighboring genes in Arabidopsis. When studying families of highly similar members it is a great advantage when data on whole genome alignments and synteny are available, e.g. in Ensembl plants (<http://plants.ensembl.org>), so that one can follow the evolution of genes in a genomic context.

During the evolution of *HSL* genes, a gene duplication that precedes the diversification of early angiosperms yielded two clades, *HSL1* and *HSL2* (Stø et al., 2015) (Figure 2G). Additionally, *HSL1* has been duplicated twice in the angiosperms and once in the monocots, giving rise to *HSL1A* and *HSL1B*, which interestingly are more similar in the kinase domain than in the LRR. Early during eudicot evolution

**Figure 3. Syntenic relation between LRR-RLK genes in *A. trichopoda* and their *A. thaliana* homologues.**

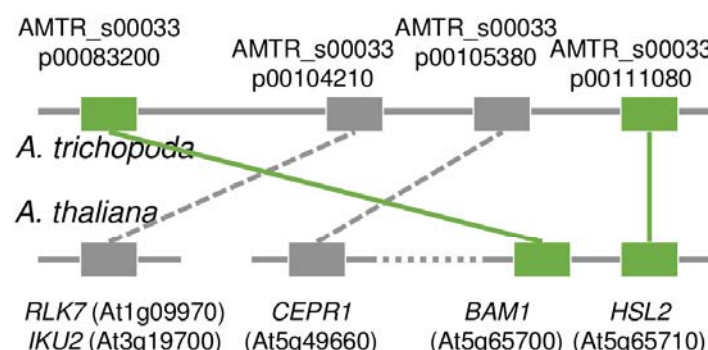

Four LRR-RLKs genes that are found in near proximity in the genome of *A. trichopoda* (SuperContig AmTr\_v1.0\_scaffold00033), have been reshuffled during angiosperm evolution, and have brought *BAM1* and *HSL2* together as neighboring genes.

279 *HSL1* was duplicated and gave rise to *HAESA* (*HAE*) (Stø et al., 2015). An early split  
 280 in the HSL clade resulted also in *At5g25930* (called *HSL3*), for which the function is  
 281 unknown. The HSL3 kinase domain seems to be more closely related to the CEPRs  
 282 while the HSL3 ectodomain is more closely related to the HSL receptors (Figure 2G).  
 283 This suggests that HSL3 might bind peptides resembling ligands of HSL1 or HSL2,  
 284 but give a CEPR-like downstream response to ligand binding. Likewise, CEPR2 is  
 285 more similar to CEPR1 with regards to the kinase domain, but closer to IKU2 and  
 286 RLK7 with regards to the LRRs.

287 A similar and more striking positional difference was observed when analyzing the  
 288 kinase and LRR domains of GASSHO (GSO) in the RGI major clade (Figure 2H); the  
 289 kinase domain forms a sister clade to the rest of the tree while the ectodomain  
 290 instead is sister to the other major clades, HSL/BAM. This implies that the two  
 291 domains of the GSO receptors have evolved with different speed, and that the  
 292 kinase domain has evolved more slowly, indicating a strong pressure against  
 293 mutational changes. Alternatively, one can speculate in a recombination event



**Figure 4. Conservation of peptides, LRR scaffold and peptide-ligand binding sites.**

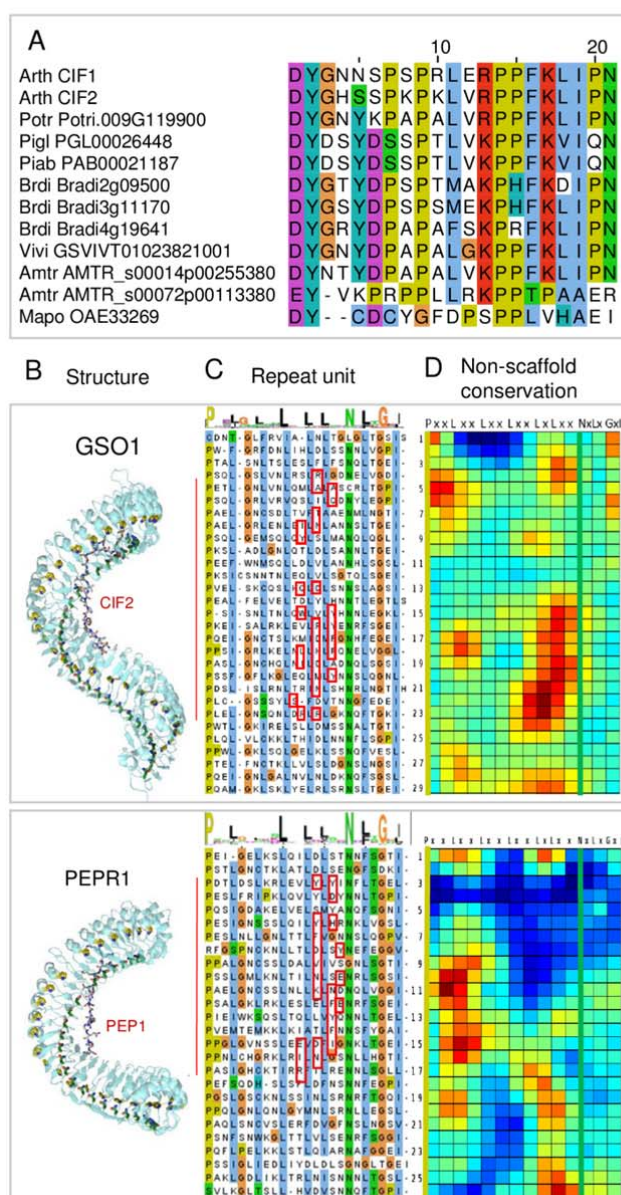

A) Conservation of CIF peptides in diverse species including angiosperms (Arth – *Arabidopsis thaliana*, Potr – *Populus trichocarpa*, Brdi – *Brachypodium distachyon*, Vivi – *Vitis vinifera*, Amt – *Amborella trichopoda*), gymnosperms (Piac – *Picea abies*, Pigl – *Picea glauca*) and a bryophyte (Mapo – *Marchantia polymorpha*). B) Crystal structure of GSO1 (PDBid: 6S6Q) and PEPR1 (PDBid: 5GR8) with their peptide ligands CIF2 and PEP1 (grey backbones), respectively, interacting along the inner side of the LRR structures. The conserved Pro (P) and Asn (N) residues of the scaffold are highlighted in mustard and green colors. C) Alignment of the 24 amino acids long leucine-rich repeat units of GSO1 and PEPR1, with coloration based on amino acid properties. Above a WebLogo (<http://weblogo.berkeley.edu/>) consensus sequence visualizing the conservation of the scaffold residues. Residues that interact with the respective peptides according to the crystal structures shown in B) are marked with red rectangles. The red vertical lines mark the repeats covered by the peptide as shown in B). D) Heat maps generated using Repeat Conservation Mapping (<http://www.bentlab.russell.wisc.edu/main/main.php>) for GSO and PEPR reflecting the degree of identity and similarity in a given position (X-axis) in a given repeat (Y-axis) of the non-scaffold residues, the most conserved are in red and least conserved in blue. The position of the conserved Ps and Ns of the scaffolds are indicated by mustard and green colored vertical lines, respectively. The higher conservation in columns 2 to 4 in some repeats coincide with conserved N-linked glycosylation sites.

294 between two ancient genes that resulted in a novel fusion gene made up of an  
 295 ectodomain and a LRR each with different evolutionary histories. GSOs have 31  
 296 LRRs while the other subclass XI receptors have only 21-23. The crystal structure of  
 297 GSO2 bound to its ligand CASPARIAN STRIP INTEGRITY FACTOR (CIFs) has  
 298 recently been solved (Okuda et al., 2020), which revealed a simple explanation: CIFs  
 299 interact with their receptors along the inner surface, and since the CIFs are longer  
 300 (20 amino acids) this surface also needs to be longer (Figure 4A-B). It is of note that

a GSO-like sequence in *M. polymorpha* clusters together with other GSO-like sequences in phylogenetic analyses of both the kinase and LRR domains, suggesting that the two domains followed different evolutionary trajectories since the earliest period of land plant diversification. We have identified potential CIF in *A. trichopoda*, gymnosperms and *M. polymorpha* (Figure 4A), and so far it is unknown whether *M. polymorpha* GSOs recognize this peptide as a ligand.

In *Arabidopsis*, the two GSO receptors are redundantly involved in regulation of stem cell identity, cell proliferation, control of seedling root growth, determination of root epidermal cell fates, and formation of a functional cuticle around the developing embryo (Tsuwamoto et al., 2008). GSO1 is additionally involved in establishment of the Casparian strip, which works as a diffusion barrier in the vasculature of the *Arabidopsis* root (Barbosa et al., 2019). *M. polymorpha* is a seedless plant, and lacks vascular tissue, and may at first sight not be expected to have a GSO gene (Zhao et al., 2013). However, a function in the furnishing of epidermal cells with a cuticle that protect them from the dry and potential hostile surrounding (San-Bento et al., 2014), might well have been very important during land plant evolution. Orthologues of genes involved in cuticle development are present in *M. polymorpha* (Bowman et al., 2017), and it is therefore of high interest to find out where the putative GSO orthologues are expressed.

### **Structural data are valuable for identification of matching ligand-receptor pairs**

When analyzing the LRR of different RLKs, one should be aware of the highly conserved amino acids making up the scaffold of the ectodomain. In the 24 residues of each repeat, certain amino acids are found in given positions in land plants (PxxLxxLxxLxxLxLxxNxLxGxl with P – Pro; L – Leu; N – Asn; G – Gly; I – Ile; x – any amino acid), and these amino acids may be as conserved as the residues involved in ligand binding (Orr and Aalen, 2017). Therefore, there is a risk that high similarity using Basic Local Alignment Search Tool (BLAST) is based primarily on the scaffold.

One example is the PEP receptors (AtPEPR1 and AtPEPR2) which in *Arabidopsis* by interaction with endogenous stress-induced PEP peptides are involved in amplification of biotic and abiotic stress responses (Safaeizadeh and Boller, 2019). BLAST searches suggest that there are LRR-RLKs in land plants that are



phylogenetically very close to the AtPEPR. However, the phylogenetic distribution of the known ligands, PEP peptides, is limited to angiosperms and PEP peptides show interfamily incompatibility even within flowering plants; PEPs of heterologous origin cannot be recognized as ligands due to the rapid co-evolution of PEPR LRRs with PEPs (Lori et al., 2015). The scaffold residues of the PEPR are highly conserved, but hardly any of the residues involved in ligand binding in Arabidopsis, according to the crystal structure (Tang et al., 2015), are conserved (Figure 4B-D), in strong contrast to for instance GSO receptors (Figure 4D) or HSL2 orthologues (Supplemental Figure 4).

Thus, the putative orthologues may be false positives in the sense that they are not likely to have a conserved function with respect to interaction with highly similar peptide ligands. Identification of ligands for homologues of PEPR receptors in lineages where their known ligands have not been identified, will be instrumental in understanding the evolution of ligand-recognition mechanisms. Possible ligand-receptor pairs have been identified widely across land plants through *in silico* searches for homologues of many other known peptide sequences. Tips for successful peptide hunting will be discussed later in the last section, and here, we walk through two cases and highlight two approaches to corroborating hypothetical interactions: IDA by modelling and CLE by genetics.

The members of peptide families interacting with receptors in the subclass XI LRR-RLK represent the PTMP type and are generated from prepro-precursors by posttranslational processing and amino acid modifications. Gene and genome duplications have facilitated evolutionary changes, but the amino acid sequences of C-terminal bioactive peptides have been conserved. Therefore, the variable region between the hydrophobic N-terminal secretion signal and the peptide motif, has evolved much faster whereas, for instance, are 10 out of the 12 amino acids of the proline-rich PTMP INFLORESCENCE DEFICIENT IN ABSCISSION (IDA) (Butenko et al., 2014), preserved in all orders of angiosperms (Stø et al., 2015).

Putative orthologues of IDA and HSL2 have been identified in *M. polymorpha* (Bowman et al., 2017) and *S. moellendorffii* (Figures 2 and 5). The crystal structure of synthetic AtIDA peptide bound to its receptor AtHAE has recently been solved, which revealed that the ligand is positioned along the inner surface of the LRR

**Figure 5. Homology models of MpHSL2 and SmHSL2 interacting with MpIDA and SmIDA peptides.**

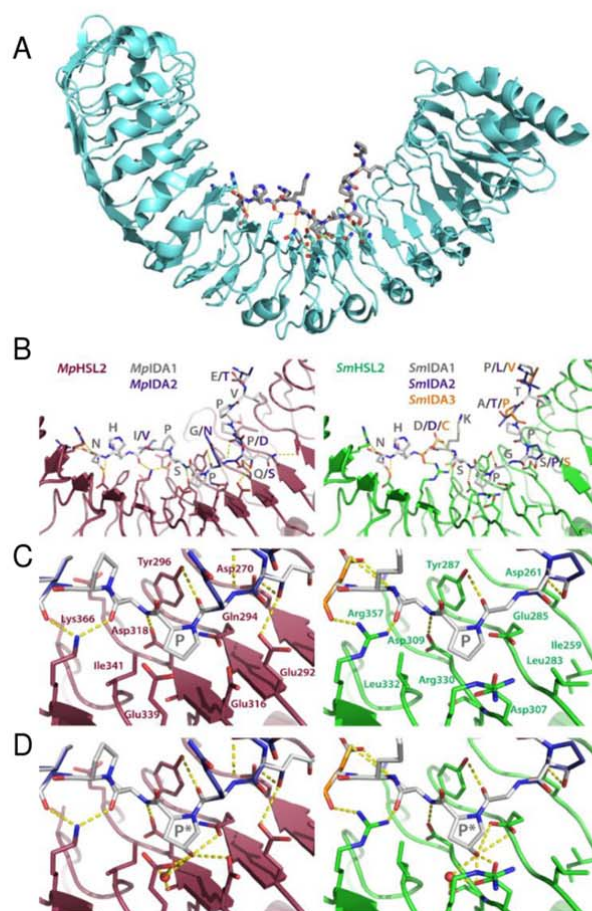

A) The AtHAE-AtIDA crystal structure (PDBid:5ixq) (Santiago et al. 2016) the IDA peptide is lining up along the inner face of the LRR structure. B) Overall models of the interaction between *M. polymorpha* and *S. moellendorffii* putative HSL2 receptors (MpHSL2 in magenta and SmHSL2 in green) with respectively two and three *M. polymorpha* and *S. moellendorffii* superimposed putative IDA peptides (grey backbones) built on the AtHAE-AtIDA structure using SWISS-MODEL (Arnold et al., 2005). Note in particular receptor interaction with the Asn (N) at the C-terminal end of the peptides. C) Close-up view of the central parts of the respective receptor models and the surrounding hydrogen bonding network, with a central Pro (P) in the ligands. D) Close-up view as in C), however, with hydroxylation of the central Pro (P\*), which facilitates formation of additional hydrogen bonds.

Central amino acids of the receptors, as well as the peptides, are shown as sticks and colored by atom type. Water molecules are shown as red spheres, and modelled based on coordinates from the AtHAE-AtIDA crystal structure. Hydrogen bonds are depicted as dotted lines (yellow). Residues involved in hydrogen bonding to the peptides are depicted with three-letter symbols in colors according to the respective structures. The peptide residues are shown in one-letter symbols. All structure figures were prepared using PyMOL (Schrödinger, LLC).

365 ectodomain of the receptor (Figure 5A) (Santiago et al., 2016). Using this structure  
366 (PDBid:5ixq), a three-dimensional model has been generated for IDA-HSL2

orthologues from oil palm, thereby substantiating a likely interaction in this monocot species (Shi et al., 2019). The same modelling strategy was used for putative peptide ligands and receptors of *M. polymorpha* and *S. moellendorffii*, and showed that the potential overall hydrogen bonding interactions between the modelled MpHSL2 and SmHSL2 receptors and their corresponding IDA peptides (MpIDA1-2 and SmIDA1-3) support receptor-peptide binding, regardless of variations in IDA-peptide sequences (Figure 5B-C).

A substantial fraction of the AtHAE amino acids generating hydrogen bonds with IDA residues are identical in MpHSL2 and SmHSL2 (Figure 5A-B and Supplemental Figure 4), and crucial residues, in particular the central Pro and the C-terminal His-Asn are also conserved in the amino acid sequence of the MpIDA1-2 and SmIDA peptides (Figure 5C). Thus, the generated models are consistent with the possible function as ligand-receptor pairs in early-diverging land plant lineages. In *Arabidopsis*, AtIDA and its receptors AtHAE and AtHSL2 are involved in cell separation processes, like floral organ abscission, lateral root emergence and root cap sloughing (Aalen et al., 2013; Shi et al., 2018). In species that shed other organs, like fruits or leaves, the IDA-HAE/HSL2 signaling module has also been found expressed at the base of the organ to be shed (Shi et al., 2019), indicating that the molecular process of cell separation is highly conserved. This suggests that gain or loss of expression of peptide signaling components through changes in their cis-regulatory elements may have served as an important driving force for evolutionary changes in plant architecture and reproductive strategies. Cell separation process also plays a role in bryophyte development, for example in air chamber formation of *M. polymorpha*. Ishizaki et al. (2015) revealed that E3 ubiquitin ligase regulates cell separation in *Marchantia* air chamber formation, and it's not known whether the IDL-HAE/HSL signaling module is involved or not in this process. It will be important to find out more about biological processes in bryophytes and lycophytes that are controlled by cell separation, where the putative IDA and HSL orthologues might have any conserved roles.

It has just started to be revealed that the CLE peptide signaling has evolutionary conserved roles from angiosperms to *P. patens* and *M. polymorpha*, two models of early-appearing land plant lineages to which molecular genetic tools are readily

applicable (Hirakawa et al., 2019; Whitewoods et al., 2018). One of the known key roles of the CLE signaling in angiosperms is to regulate cell proliferation in the sporophytic ( $2n$ ) meristems, which grow indeterminately. In the bryophytes, the sporophyte shows determinate growth while indeterminate meristems are present in the gametophyte body ( $1n$ ). The CLE signaling in both *P. patens* and *M. polymorpha* is involved in cell proliferation in the gametophyte (Hirakawa et al., 2019; Whitewoods et al., 2018). These studies support the idea that peptide-receptor modules are conserved and employed in a parallel manner although the evolutionary relationship between the bryophyte gametophytic meristems and the vascular plant sporophytic meristems is still debated (Bowman, 2013).

In both cases, structural and biochemical studies are needed to establish that these peptide ligand-receptor pairs are conserved between divergent lineages.

#### **PTMPs of different families share structural features**

Being the largest peptide family, the CLE family is diverse, with altogether 32 members in Arabidopsis, some without and some with known receptors, e.g. CLV3 and CLE1-8 can bind and activate CLV1, BAM1 and BAM2; but not BAM3, which instead has a preference for the arginine-rich CLE45 (Endo et al., 2013; Hazak et al., 2017). There are three TDR/PXY-interacting CLE peptides that have an N-terminal histidine (His, H) residue instead of the arginine (Arg, R) found in this position in other CLE peptide (Ito et al., 2006) (Figure 6). While TDR/PXY receptors and H-type CLE peptides are involved in vascular development, R-type CLE peptides are known for involvement in maintenance of the root and shoot meristems (Hirakawa and Sawa, 2019; Yamaguchi et al., 2016).

To our surprise, several Arabidopsis CLE peptides were found to interact with LRRs of different clades. The AtCLE9/CLE10 peptides interact with both the HSL1 and BAM1 receptors, depending on tissue type (Qian et al., 2018). AtCLE14 peptide can signal through AtPEPR2 (Gutierrez-Alanis et al., 2017). While PEPs and CLEs differ in length, the C-terminal 12 amino acids of mature PEPs share sequence similarity to CLEs (Table 1A), offering a possible explanation for the recognition mechanism. Another CLE peptide, AtCLE45, which diverge from other CLE peptides by a number of arginine (Arg, R) residues near its N-terminus, is perceived by canonical CLE



**Figure 6. Conservation of CLE and IDA peptides.**

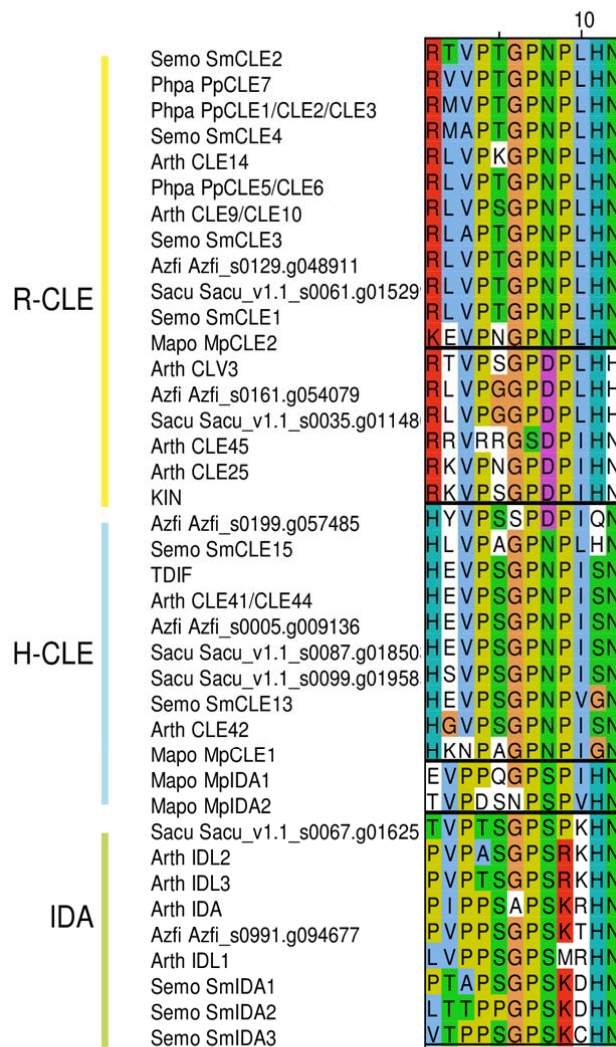

Alignments of mature CLE and IDA peptides from the bryophyte *M. polymorpha* to angiosperms. Note shared core residues (SGPS) and C-terminal end (NH) between IDA and some of the CLE peptides, and the presence of almost identical R-CLE, H-CLE and IDA peptides in early-diverging plants, ferns and Arabidopsis. The amino acids are colored according to chemical properties.

Hazak et al., 2017).

These “unconventional” ligand-receptor pairs raise a question of how the specificity of ligand-receptor pairs evolves. It is of note that genes encoding CLE peptides highly similar to AtCLE9/CLE10 are present in both *M. polymorpha* and *P. patens* (PpCLE5/CLE6) (Whitewoods et al., 2018) (Figure 6). We therefore speculate that during early evolution of peptide signaling, there were fewer peptides, and receptors were less specific. Accordingly, large-scale clustering analyses of land plant CLE peptides based on their entire prepropeptide sequences found a smaller number of clusters in *S. moellendorffii* and bryophyte species, indicative of the diversification of CLE peptide sequences, which could have resulted in changes in the specificity of ligand-receptor interactions, during land plant evolution (Goad et al., 2017). Hirakawa et al. (2017) found that a synthetic CLE peptide, KIN named after the K (2<sup>nd</sup>), I (10<sup>th</sup>), and N (12<sup>th</sup>) residues crucial for function, exerts both R-type and H-type CLE activities and interact directly with both receptors (Figure 6) (Hirakawa et al., 2017). Intriguingly, the three critical residues in KIN are conserved in the H-type CLE of *M. polymorpha*, MpCLE1, illustrating the potential for a broader specificity in ligand-receptor interaction hidden in short mature peptide sequences (Figure 6).

We may also learn from some common structural features in known endogenous peptide ligands, reviewed and discussed in (Zhang et al., 2016). For instance, the IDA and CLE peptides are all 12-14 amino acids long, proline-rich, and need C-terminal NH or HH residues for function (Figure 6; Table 1A). Similarities are also recognized among CEPs, PIP-PIPLs, and IDA peptides with respect to the size and amino acid composition. Most of the CEPs and PIP-PIPLs, however, lack the C-terminal HN or HH residues that have been shown to interact with two closely positioned Arg (R) residues found in many receptors (Hou et al., 2014; Song et al., 2016; Vie et al., 2015) (Table 1A). Instead, CEPs and PIP-PIPLs share the C-terminal GxGH motif (Vie et al., 2015) (Table 1A). The CEPs and PIP-PIPLs have been demonstrated to signal through closely-related receptors of the HSL major clade, CEPRs and RLK7, respectively (Figure 2). This point to the possibility that a ligand recognition mechanism is conserved among recently diversified receptors, and in the case of the CEP and PIP-PIPL signaling, the GxGH motif could be crucial for peptide-receptor interactions.

463

464 **Proline hydroxylation and tyrosine sulfation may have contributed to more**  
 465 **stringent peptide-receptor interactions**

466 Structural variation of signaling peptides with more stringent ligand-receptor  
 467 interactions can evolve not only from changes in the primary sequences, but through  
 468 proteolytic processing of prepropeptides to release bioactive small peptides and  
 469 post-translational modifications (PTMs) of amino acids. In fact, mass spectrometric  
 470 analyses identified PTM residues in mature, biologically functional peptides,  
 471 suggesting their importance (Kondo et al., 2006). The PTM processes tend to be  
 472 irreversible and hence require precise regulation.

473 Two PTMs, proline hydroxylation and hydroxyproline arabinosylation, have been  
 474 detected in planta on CLE peptides (Stührwohldt and Schaller, 2019), and synthetic  
 475 peptides of the IDA/IDL family have been shown to bind and activate the HAE and  
 476 HSL2 receptors more efficiently with than without hydroxylation of the central proline  
 477 (Pro) (Butenko et al., 2014; Santiago et al., 2016). Prolyl 4-hydroxylases (P4Hs) and  
 478 hydroxyproline O-arabinosyl transferase (HPAT), which mediate proline  
 479 hydroxylation and hydroxyproline arabinosylation, respectively, are evolutionary  
 480 conserved from algae to angiosperms (Myllyharju, 2003; Ogawa-Ohnishi et al.,  
 481 2013). Thus, mature peptides produced from IDA and CLE orthologues may have  
 482 been hydroxylated already in early land plants (Table 1A) (Bowman et al., 2017;  
 483 Oelkers et al., 2008). As an initial approach to test this possibility, ligand-receptor  
 484 interactions of putative *S. moellendorffii* and *M. polymorpha* IDA and HSL2  
 485 orthologues were modelled based on the crystal structure of AtIDA and AtHAE both  
 486 without and with the hydroxylated central Pro (Figure 5B and C). In these models the  
 487 hydroxylation postulated an increased number of hydrogen bonds, which would  
 488 result in a stronger interaction.

489 Structural analyses of bioactive forms of PTMPs in basal land plants will be critical  
 490 for confirming the prediction from the models. These data, however, point to the  
 491 possible contribution of PTMs in diversification of peptide ligands and in defining the  
 492 specificity of ligand-receptor interaction since the early stages of land plant evolution.



We have identified putative homologues in gymnosperms, ferns, lycophytes of genes encoding RGF, CIF and phytosulfokine (PSK) peptides, which are the ligands of RGI, GSO, and PSK receptors (PSKR), respectively, and characterized by the serial arrangement of aspartic acid (Asp, D) and sulfated tyrosine (Tyr, Y) residues at the N-terminus of the mature peptide. In Arabidopsis, Tyr sulfation regulates protein-protein interactions and affects receptor binding (Kaufmann and Sauter, 2019; Matsubayashi and Sakagami, 1996; Shinohara et al., 2016). Komori et al. (2009) identified TYROSYLPROTEIN SULFOTRANSFERASE (AtTPST) as an enzyme responsible for tyrosine sulfation in Arabidopsis. TPST-encoding genes are conserved across land plants and are found in angiosperms as well as in *S. moellendorffii*, *P. patens*, and *M. polymorpha*, supporting the likely presence of sulfated signaling peptides and the plausible contribution of PTMs to the ligand diversity in early land plant evolution. The solved crystal structure of RGF1 and its receptor RGI3 (At4g26540) (Song et al., 2016); (note that the *RGFR/RGI* gene nomenclature differs among literatures) revealed that the DY<sup>sulf</sup> residues are recognized by the amino acid motif RxGG of the receptor. Importantly, the RGI orthologues from bryophytes to Arabidopsis, contain this motif, which distinguishes RGIs from other LRR-RLK XI members (Supplemental Figure 5).

RGF and CIF peptides may seem difficult to tell apart as they both start with DY<sup>sulf</sup>, end with an asparagine (Asn, N), and are enriched in proline (Pro, P) residues. But they are, as mentioned, of different lengths (Figure 4A and Figure 7). Alignments of putative RGF orthologues differ from that of CIFs, and additionally suggest that RGFs fall in two groups, which can be hypothesized to correspond to the two RGI receptor groups mentioned earlier (Figure 7 and Supplemental Figure 3).

The mature active form of PSK is easily recognized, but difficult to find in *in silico* searches, as the mature signaling molecule is just a pentapeptide, YIYIQ, with two sulfated Tyr (Matsubayashi et al., 1996). In Arabidopsis, PSKs are perceived by two LRR-RLKs of subclass X, PSKRs, and bind in a small island in the LRR structure that doesn't fit in with the rest of the repeats. Amino acids involved in peptide binding in this region are conserved according to homology mapping (Amano et al., 2007; Matsubayashi et al., 2002) (Supplemental Figure 6). We have identified putative homologues of PSK and PSKR in *P. abies*. Together with previous studies that

**Figure 7. Conservation of RGF peptides.**

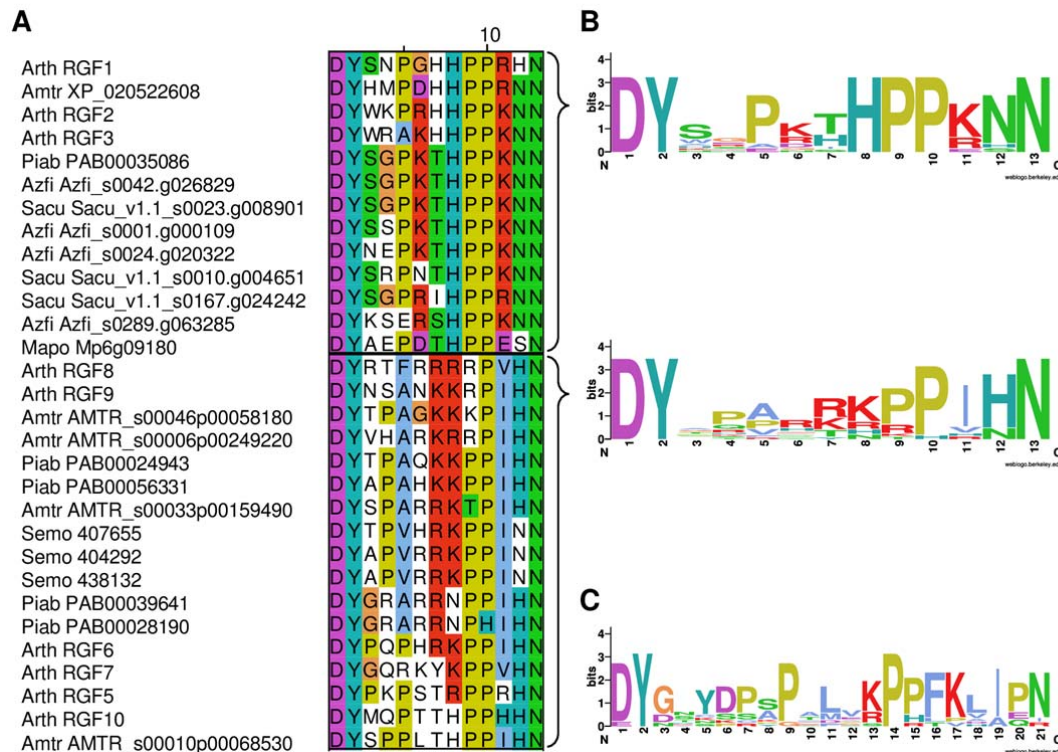

A) Alignment of RGFs from the bryophyte *M. polymorpha* to angiosperms, with amino acids colored according to chemical properties, suggesting that there are two distinct types of RGFs. B) WEBLogo for the two RGF types. C) For comparison, WEBLogo for CIF peptides.

report the identification of *PSK*-like genes and bioactivities in *Cryptomeria japonica* and *Cunninghamia lanceolata*, the *PSK* signaling is likely conserved in gymnosperms (Igasaki et al., 2003; Wu et al., 2019). We have also identified putative *PSK*-like genes in the bryophyte model plants (Figure 8). In the *PSK*-like sequences found in *P. patens* and *M. polymorpha* the Asp residue that precedes the *YIYIQ* sequence is missing, but the conserved region N-terminally to the *DYIYIQ* motif can still be recognized. Such conserved sequences outside the assumed mature peptide, might be recognition sites for processing enzymes. This suggests that mechanisms for processing prepropeptides to mature secretable peptides must have evolved at an early stage of the evolution of peptide signaling.

Figure 8. Conservation of PSK

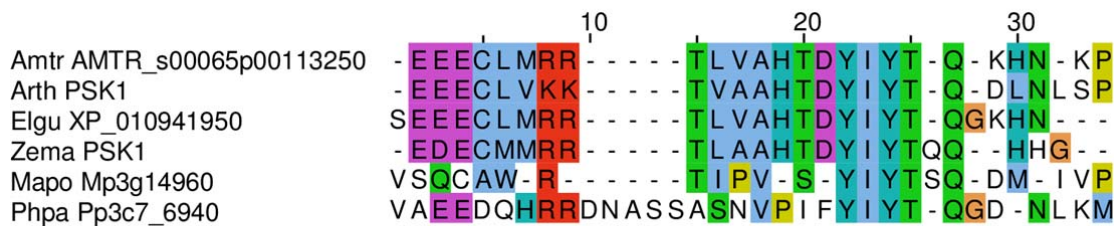

Alignments of a part of PSK propeptides covering the active peptide (YIYTQ) from diverse species, and the nearby conserved motif of unknown function. The amino acids are colored according to chemical properties. (Elgu – *Elaeis guineensis*, oil palm; Zema – *Zea mays*)

Our comparison of signaling peptides have revealed similarities between members of different peptide families, suggesting common origin, although the highly variable prepro sequences would rather support convergent evolution. Anyhow, an increase in number and structural variations of both peptides and receptors could have contributed to greater stringency of interactions of each peptide-receptor pair over evolutionary time.

## Perspectives

With the increasing availability of genomic data, we can now analyze the molecular inventory of peptide signaling components in all major lineages of land plants. All known signaling peptides were originally identified in angiosperms. Their homologues, however, exist in other taxa (Figure 1). Several peptide classes have their ancestry in bryophytes while no trustworthy homologues have been found to date in extant algal genomes, suggesting that peptide signaling evolved in the earliest land plants.

Most receptor families of LRR-RLK XI have their bryophyte postulated orthologues (Figure 2). Since PTMPs are short, and the rest of the prepropeptides highly variable, it is difficult to find peptide-encoding genes by conventional BLAST

searches. During annotation of genes in newly sequenced genomes, peptide genes are for the same reasons at risk of being overlooked. We have, however, successfully identified RGF, PSK and CIF peptides using Pattern Hit Initiated (PHI) BLAST searches where the residues DY should be present, and analyzed the hits for a suitable prepropeptide length, presence of a hydrophobic N-terminal export signal, and the assumed mature peptide sequence positioned near or at the C-terminal end (Figure 1; Table 1). Another useful procedure is to first identify homologues in seed plants and ferns, confirm their homology, and thereafter include these sequences in queries when setting up new searches in lycophytes and bryophytes. Limiting the query sequences to the region encompassing mature peptides works more efficiently, but the results should be examined using the entire coding sequences as in PHI-BLAST. When interpreting the sequences, it has to be kept in mind that one can collect and analyze sequence information only from extant species, which may have highly diversified from early land plant ancestors. As discussed in the previous section, *in silico* modelling based on solved crystal structures of related ligand/receptor pairs, turned out to be helpful in substantiating hypothesized interactions of putatively orthologous ligand-receptor pairs. A topic in its own right, which we have not covered here, is the importance of extensive interactions between LRR-RLK subclass XI receptors and the multi-faceted smaller co-receptors as key partners in receptor complexes in diverse peptide signaling pathways (Gou and Li, 2020; He et al., 2018; Hohmann et al., 2018; Liang and Zhou, 2018; Ma et al., 2016).

As we have seen, genes encoding potential peptide ligands and receptors are now available in a wide range of species including non-seed plants. Concurrently, land plant evolution has successfully made use of a broadened spectrum of endogenous and exogenous ligands as more complex organ evolved and interspecies interactions increased. Except for the bryophyte CLE signaling pathways, however, biological roles have not been assigned for peptide signaling outside of seed plants. Functional and biochemical studies of these sequences are critical for elucidating the (r)evolutionary history of land plant peptide signaling pathways.

A number of receptors, even some in Arabidopsis, are orphan, in the sense that their peptide ligands are unknown. Likewise, all PTMP families seem to have orphan members. These may have resulted from gene or genome duplications where some

sister genes have accumulated mutations that make it difficult to bind receptors. An alternative (and likely) explanation is that more complex genetic, molecular and biochemical factors and condition for peptide-mediated cell-to-cell communication remains to be discovered.

*Where do new peptide-encoding genes come from? Can we trace their ancestry back in ancient peptides conserved in earlier-appearing land plant lineages?* Progressive expansion of the peptide repertoire is observed during land plant evolution. Several peptide families show similarities in their mature peptide sequences. Nevertheless, there is no conclusive evidence for the origin of derived peptide families. The highly variable central part of peptide precursor sequences makes it difficult to infer interfamily relationships by phylogenetic analyses. At present it looks like the largest expansion of the peptide diversity occurred during seed plant evolution (Figure 1). This may reflect the increased need for cell-to-cell communication for development of more complex organisms with more complex organs. More genomes of gymnosperm and fern species should be sequenced to test how tight this correlation is.

Our knowledge of the biological roles of the peptide-LRR-RLK modules is limited mostly to angiosperm organs such as flowers and seeds, vascular tissue, and multicellular root and shoot meristems. These organs evolved in the vascular plant lineages, and most lack homologous structures outside of flowering plants. A question therefore arises as to whether these peptide signaling modules mainly have undergone neofunctionalization in derived lineages. This may well be the case from an organismal perspective, however, from a molecular and cellular perspective it may not be. Where and when a signaling system triggers a given outcome (e.g. cell division or cell separation) may be the crux of the matter. Thus, a very important next step in tracing the evolutionary origin and history of land plant peptide signaling pathways will be to investigate thoroughly the expression patterns of LRR-RLK receptors and their putative peptide ligands, and to study downstream molecular events.

## Acknowledgement

We apologize to authors of literature not discussed due to space constraints. Investigations by CF were supported by Nakatsuji Foresight Foundation Research Grant and JSPS KAKENHI Grant Number 20K06770.

### **Author Contributions**

MW and SS initiated and drafted the work; CF, AKK, RMA and RBA identified and analyzed sequences; MH performed structure analyses and modelling; CF and RBA wrote the article.



626 **Table 1. Major families of signaling peptides in land plants.**

| <b>A. Small post-translationally modified peptides (PTMP)</b> |                                 |                                                        | <u>Modified amino acids:</u><br>P – hydroxylated Pro<br>Y – sulfated Tyr |
|---------------------------------------------------------------|---------------------------------|--------------------------------------------------------|--------------------------------------------------------------------------|
| Peptide family                                                | Major receptor(s)               | Amino acid sequence of a representative mature peptide | Amino acid sequence of mature peptide in <i>M. polymorpha</i>            |
| CEP                                                           | CEPR<br>(LRR-RLK XI)            | Arth CEP1:<br>DFRPTNPGNSPGVGH                          |                                                                          |
| CIF                                                           | GSO1/SGN3, GSO2<br>(LRR-RLK XI) | Arth CIF1:<br>DYGNNSPSPRLERPPFKLIPN                    | Putative MpCIF:<br>DYCDCYGFDPSPPLVHAEITF                                 |
| CLE<br>(CLV3/R class)                                         | CLV<br>(LRR-RLK XI)             | Arth CLV3:<br>RTVPSPGPDPLHH                            | MpCLE2:<br>KEVPNGPNPLHN                                                  |
| CLE<br>(TDIF/H class)                                         | PXY/TDR<br>(LRR-RLK XI)         | Arth CLE41:<br>HEVPSPGPNPISN                           | MpCLE1:<br>HKNPAGPNPIGN                                                  |
| IDA + IDL                                                     | HAE, HSL<br>(LRR-RLK XI)        | Arth IDA:<br>PIPPSAPSKRHN                              | MpIDA1:<br>EVPPQGPSPIHN                                                  |
| Pep                                                           | PEPR<br>(LRR-RLK XI)            | Arth Pep1:<br>ATKVKAKQRGKEKVSSGRPGQHN                  |                                                                          |
| PIP + PIPL                                                    | RLK7<br>(LRR-RLK XI)            | Arth TOLS2/PIPL3:<br>ASGPSRRGAGH                       |                                                                          |
| PSK                                                           | PSKR<br>(LRR-RLK X)             | Arth PSK1:<br>YIYTQ                                    | Putative MpPSK:<br>YIYTSQ                                                |
| PSY                                                           | PSYR<br>(LRR-RLK X)             | Arth PSY1:<br>DYGDPANPKHDPGVPPS                        |                                                                          |
| RGF/GLV/                                                      | RGFR                            | Arth RGF1/GLV11:                                       | Putative MpRGF:                                                          |

  

| <b>B. Cysteine-rich peptide (CRP)</b> |                                                       |                                                                                               | <u>Modified amino acids</u><br>C – conserved Cys                                                    |
|---------------------------------------|-------------------------------------------------------|-----------------------------------------------------------------------------------------------|-----------------------------------------------------------------------------------------------------|
| Peptide family                        | Major receptor(s)                                     | Amino acid sequence of the conserved region in a representative peptide                       | <i>M. polymorpha</i> peptide sequence                                                               |
| EPF-EPFL                              | ER, ERL<br>(LRR-RLK XIII)                             | Arth EPFL5:<br>PGSVPPMCRKCGKCEPCAVHVP IQPGLIMPLEYYP<br>EAWRCCKGNKLFMP                         | MpEPFL2:<br>MGSKPPNCEDKCHYCNPCAEVEV<br>PISNREVQKVKALETDAAGTSY<br>QKVSTALADPHDTNMPESWRCA<br>CGDEYFNP |
| LURE                                  | PRK (LRR-RLK III),<br>MIK-MDIS<br>(LRR-RLK XI/XII-VI) | Arth LURE1.1:<br>ILIKESSEERIPFNPVASFDPRLNQLKIGKIG<br>YCFDCARACMRDRYIRTCSFERKLCRCYSYSHHH<br>TG |                                                                                                     |
| RALF-RALFL                            | CrRLK1L family                                        | Arth RALF1:<br>ATTKYISYQSLKRNSVPCSRRGASYNNQNGAQANPY<br>SRGCSKIARCRS                           | MpRALF:<br>ASGYVVGYGALTANRVP CPPQSG<br>RSYYTPGCS TASGPVRPYTRGCS<br>TITRCARDG                        |
| SCR/SP11-SCRL                         | S-domain RLK                                          | Brol SCR6:<br>NLKKNVCGKTRLP GP CGDSGASSCRDLYNQTEKMPV<br>SCRCVPTGRFC SLCK                      |                                                                                                     |
| TPD1                                  | EMS1<br>(LRR-RLK X)                                   | Arth TPD1:<br>ERIGEKCKSTDIVVNQAVTEPMNGIPGYMVEITNQ<br>MSGCIISRIHINCGWFSSAKLINPRVF              | MpTPD1:<br>QSRRLISDQCSNKDISIIQNEE<br>TNAGIPRYVVQIVNTCISDCAPT<br>DIHVF CGWFASSPLVNPNYF               |



627

628



# Parsed Citations

**Aalen, R.B., Wildhagen, M., Sto, I.M., and Butenko, M.A. (2013). IDA: a peptide ligand regulating cell separation processes in Arabidopsis. Journal of Experimental Botany 64, 5253-5261.**

Pubmed: [Author and Title](#)

Google Scholar: [Author Only Title Only Author and Title](#)

**Amano, Y., Tsubouchi, H., Shinohara, H., Ogawa, M., and Matsubayashi, Y. (2007). Tyrosine-sulfated glycopeptide involved in cellular proliferation and expansion in Arabidopsis. Proceedings of the National Academy of Sciences of the United States of America 104, 18333-18338.**

Pubmed: [Author and Title](#)

Google Scholar: [Author Only Title Only Author and Title](#)

**Amborella Genome, P. (2013). The Amborella genome and the evolution of flowering plants. Science 342, 1241089.**

Pubmed: [Author and Title](#)

Google Scholar: [Author Only Title Only Author and Title](#)

**Banks, J.A., Nishiyama, T., Hasebe, M., Bowman, J.L., Gribskov, M., dePamphilis, C., Albert, V.A., Aono, N., Aoyama, T., Ambrose, B.A., et al. (2011). The Selaginella genome identifies genetic changes associated with the evolution of vascular plants. Science 332, 960-963.**

Pubmed: [Author and Title](#)

Google Scholar: [Author Only Title Only Author and Title](#)

**Barbosa, I.C.R., Rojas-Murcia, N., and Geldner, N. (2019). The Casparian strip-one ring to bring cell biology to lignification? Current Opinion in Biotechnology 56, 121-129.**

Pubmed: [Author and Title](#)

Google Scholar: [Author Only Title Only Author and Title](#)

**Bowman, J.L. (2013). Walkabout on the long branches of plant evolution. Curr Opin Plant Biol 16, 70-77.**

Pubmed: [Author and Title](#)

Google Scholar: [Author Only Title Only Author and Title](#)

**Bowman, J.L., Kohchi, T., Yamato, K.T., Jenkins, J., Shu, S., Ishizaki, K., Yamaoka, S., Nishihama, R., Nakamura, Y., Berger, F., et al. (2017). Insights into Land Plant Evolution Garnered from the Marchantia polymorpha Genome. Cell 171, 287-304.e215.**

Pubmed: [Author and Title](#)

Google Scholar: [Author Only Title Only Author and Title](#)

**Butenko, M.A., Vie, A.K., Brembu, T., Aalen, R.B., and Bones, A.M. (2009). Plant peptides in signalling: looking for new partners. Trends in Plant Science 14, 255-263.**

Pubmed: [Author and Title](#)

Google Scholar: [Author Only Title Only Author and Title](#)

**Butenko, M.A., Wildhagen, M., Albert, M., Jehle, A., Kalbacher, H., Aalen, R.B., and Felix, G. (2014). Tools and Strategies to Match Peptide-Ligand Receptor Pairs. Plant Cell 26, 1838-1847.**

Pubmed: [Author and Title](#)

Google Scholar: [Author Only Title Only Author and Title](#)

**Caine, R.S., Chater, C.C., Kamisugi, Y., Cuming, A.C., Beerling, D.J., Gray, J.E., and Fleming, A.J. (2016). An ancestral stomatal patterning module revealed in the non-vascular land plant Physcomitrella patens. Development 143, 3306-3314.**

Pubmed: [Author and Title](#)

Google Scholar: [Author Only Title Only Author and Title](#)

**Chater, C.C.C., Caine, R.S., Fleming, A.J., and Gray, J.E. (2017). Origins and Evolution of Stomatal Development. Plant Physiol 174, 624-638.**

Pubmed: [Author and Title](#)

Google Scholar: [Author Only Title Only Author and Title](#)

**Clark, J.W., and Donoghue, P.C.J. (2018). Whole-Genome Duplication and Plant Macroevolution. Trends in Plant Science 23, 933-945.**

Pubmed: [Author and Title](#)

Google Scholar: [Author Only Title Only Author and Title](#)

**de Bang, T.C., Lay, K.S., Scheible, W.R., and Takahashi, H. (2017). Small peptide signaling pathways modulating macronutrient utilization in plants. Curr Opin Plant Biol 39, 31-39.**

Pubmed: [Author and Title](#)

Google Scholar: [Author Only Title Only Author and Title](#)

**de Vries, J., Curtis, B.A., Gould, S.B., and Archibald, J.M. (2018). Embryophyte stress signaling evolved in the algal progenitors of land plants. Proc Natl Acad Sci U S A 115, E3471-E3480.**

Pubmed: [Author and Title](#)

Google Scholar: [Author Only Title Only Author and Title](#)

**Delwiche, C.F., and Cooper, E.D. (2015). The Evolutionary Origin of a Terrestrial Flora. Curr Biol 25, R899-910.**

Pubmed: [Author and Title](#)

Google Scholar: [Author Only Title Only Author and Title](#)

**Endo, S., Shinohara, H., Matsubayashi, Y., and Fukuda, H. (2013). A novel pollen-pistil interaction conferring high-temperature tolerance during reproduction via CLE45 signaling. Curr Biol 23, 1670-1676.**

Pubmed: [Author and Title](#)

Google Scholar: [Author Only Title Only Author and Title](#)

**Fernandez, A., Hilson, P., and Beeckman, T. (2013). GOLVEN peptides as important regulatory signalling molecules of plant development. J Exp Bot 64, 5263-5268.**

Pubmed: [Author and Title](#)

Google Scholar: [Author Only Title Only Author and Title](#)

**Friedman, W.E., and Williams, J.H. (2004). Developmental evolution of the sexual process in ancient flowering plant lineages. Plant Cell 16 Suppl, S119-132.**

Pubmed: [Author and Title](#)

Google Scholar: [Author Only Title Only Author and Title](#)

**Gensel, P.G. (2008). The Earliest Land Plants. Annual Review of Ecology, Evolution, and Systematics 39, 459-477.**

Pubmed: [Author and Title](#)

Google Scholar: [Author Only Title Only Author and Title](#)

**Ghorbani, S., Lin, Y.C., Parizot, B., Fernandez, A., Njo, M.F., Van de Peer, Y., Beeckman, T., and Hilson, P. (2015). Expanding the repertoire of secretory peptides controlling root development with comparative genome analysis and functional assays. Journal of Experimental Botany 66, 5257-5269.**

Pubmed: [Author and Title](#)

Google Scholar: [Author Only Title Only Author and Title](#)

**Goad, D.M., Zhu, C., and Kellogg, E.A (2017). Comprehensive identification and clustering of CLV3/ESR-related (CLE) genes in plants finds groups with potentially shared function. The New phytologist 216, 605-616.**

Pubmed: [Author and Title](#)

Google Scholar: [Author Only Title Only Author and Title](#)

**Gong, Z., Morales-Ruiz, T., Ariza, R.R., Roldan-Arjona, T., David, L., and Zhu, J.K. (2002). ROS1, a Repressor of Transcriptional Gene Silencing in Arabidopsis, Encodes a DNA Glycosylase/Lyase. Cell 111, 803-814.**

Pubmed: [Author and Title](#)

Google Scholar: [Author Only Title Only Author and Title](#)

**Gou, X., and Li, J. (2020). Paired Receptor and Coreceptor Kinases Perceive Extracellular Signals to Control Plant Development. Plant Physiol 182, 1667-1681.**

Pubmed: [Author and Title](#)

Google Scholar: [Author Only Title Only Author and Title](#)

**Grienerberger, E., and Fletcher, J.C. (2015). Polypeptide signaling molecules in plant development. Curr Opin Plant Biol 23, 8-14.**

Pubmed: [Author and Title](#)

Google Scholar: [Author Only Title Only Author and Title](#)

**Gutierrez-Alanis, D., Yong-Villalobos, L., Jimenez-Sandoval, P., Alatorre-Cobos, F., Oropeza-Aburto, A., Mora-Macias, J., Sanchez-Rodriguez, F., Cruz-Ramirez, A., and Herrera-Estrella, L. (2017). Phosphate Starvation-Dependent Iron Mobilization Induces CLE14 Expression to Trigger Root Meristem Differentiation through CLV2/PEPR2 Signaling. Dev Cell 41, 555-570 e553.**

Pubmed: [Author and Title](#)

Google Scholar: [Author Only Title Only Author and Title](#)

**Harris, B.J., Harrison, C.J., Hetherington, A.M., and Williams, T.A (2020). Phylogenomic Evidence for the Monophyly of Bryophytes and the Reductive Evolution of Stomata. Curr Biol.**

Pubmed: [Author and Title](#)

Google Scholar: [Author Only Title Only Author and Title](#)

**Hazak, O., Brandt, B., Cattaneo, P., Santiago, J., Rodriguez-Villalon, A., Hothorn, M., and Hardtke, C.S. (2017). Perception of root-active CLE peptides requires CORYNE function in the phloem vasculature. EMBO reports 18, 1367-1381.**

Pubmed: [Author and Title](#)

Google Scholar: [Author Only Title Only Author and Title](#)

**He, Y., Zhou, J., Shan, L., and Meng, X. (2018). Plant cell surface receptor-mediated signaling - a common theme amid diversity. J Cell Sci 131.**

Pubmed: [Author and Title](#)

Google Scholar: [Author Only Title Only Author and Title](#)

**Hirakawa, Y., and Sawa, S. (2019). Diverse function of plant peptide hormones in local signaling and development. Curr Opin Plant Biol 51, 81-87.**

Pubmed: [Author and Title](#)

Google Scholar: [Author Only Title Only Author and Title](#)

**Hirakawa, Y., Torii, K.U., and Uchida, N. (2017). Mechanisms and Strategies Shaping Plant Peptide Hormones. Plant & cell physiology 58, 1313-1318.**

Pubmed: [Author and Title](#)

Google Scholar: [Author Only Title Only Author and Title](#)

Hirakawa, Y., Uchida, N., Yamaguchi, Y.L., Tabata, R., Ishida, S., Ishizaki, K., Nishihama, R., Kohchi, T., Sawa, S., and Bowman, J.L. (2019). Control of proliferation in the haploid meristem by CLE peptide signaling in *Marchantia polymorpha*. *PLoS genetics* 15, e1007997-e1007997.

Pubmed: [Author and Title](#)

Google Scholar: [Author Only Title Only Author and Title](#)

Hohmann, U., Santiago, J., Nicolet, J., Olsson, V., Spiga, F.M., Hothorn, L.A., Butenko, M.A., and Hothorn, M. (2018). Mechanistic basis for the activation of plant membrane receptor kinases by SERK-family coreceptors. *Proc Natl Acad Sci U S A* 115, 3488-3493.

Pubmed: [Author and Title](#)

Google Scholar: [Author Only Title Only Author and Title](#)

Hou, S., Wang, X., Chen, D., Yang, X., Wang, M., Turra, D., Di Pietro, A., and Zhang, W. (2014). The secreted peptide PIP1 amplifies immunity through receptor-like kinase 7. *PLoS Pathog* 10, e1004331.

Pubmed: [Author and Title](#)

Google Scholar: [Author Only Title Only Author and Title](#)

Igasaki, T., Akashi, N., Ujino-Ihara, T., Matsubayashi, Y., Sakagami, Y., and Shinohara, K. (2003). Phytosulfokine stimulates somatic embryogenesis in *Cryptomeria japonica*. *Plant Cell Physiol* 44, 1412-1416.

Pubmed: [Author and Title](#)

Google Scholar: [Author Only Title Only Author and Title](#)

Ishizaki, K. (2017). Evolution of land plants: insights from molecular studies on basal lineages. *Biosci Biotechnol Biochem* 81, 73-80.

Pubmed: [Author and Title](#)

Google Scholar: [Author Only Title Only Author and Title](#)

Ito, Y., Nakanomyo, I., Motose, H., Iwamoto, K., Sawa, S., Dohmae, N., and Fukuda, H. (2006). Dodeca-CLE peptides as suppressors of plant stem cell differentiation. *Science* 313, 842-845.

Pubmed: [Author and Title](#)

Google Scholar: [Author Only Title Only Author and Title](#)

Kaufmann, C., and Sauter, M. (2019). Sulfated plant peptide hormones. *J Exp Bot* 70, 4267-4277.

Pubmed: [Author and Title](#)

Google Scholar: [Author Only Title Only Author and Title](#)

Kenrick, P., and Crane, P.R. (1997). The origin and early evolution of plants on land. *Nature* 389, 33-39.

Pubmed: [Author and Title](#)

Google Scholar: [Author Only Title Only Author and Title](#)

Kutschera, U., and Wang, Z.-Y. (2012). Brassinosteroid action in flowering plants: a Darwinian perspective. *Journal of experimental botany* 63, 3511-3522.

Pubmed: [Author and Title](#)

Google Scholar: [Author Only Title Only Author and Title](#)

Li, F.W., Brouwer, P., Carretero-Paulet, L., Cheng, S., de Vries, J., Delaux, P.M., Eily, A., Koppers, N., Kuo, L.Y., Li, Z., et al. (2018). Fern genomes elucidate land plant evolution and cyanobacterial symbioses. *Nature plants* 4, 460-472.

Pubmed: [Author and Title](#)

Google Scholar: [Author Only Title Only Author and Title](#)

Liang, X., and Zhou, J.M. (2018). Receptor-Like Cytoplasmic Kinases: Central Players in Plant Receptor Kinase-Mediated Signaling. *Annu Rev Plant Biol* 69, 267-299.

Pubmed: [Author and Title](#)

Google Scholar: [Author Only Title Only Author and Title](#)

Ligrone, R., Duckett, J.G., and Renzaglia, K.S. (2012). Major transitions in the evolution of early land plants: a bryological perspective. *Annals of botany* 109, 851-871.

Pubmed: [Author and Title](#)

Google Scholar: [Author Only Title Only Author and Title](#)

Liu, P.L., Du, L., Huang, Y., Gao, S.M., and Yu, M. (2017). Origin and diversification of leucine-rich repeat receptor-like protein kinase (LRR-RLK) genes in plants. *BMC Evol Biol* 17, 47.

Pubmed: [Author and Title](#)

Google Scholar: [Author Only Title Only Author and Title](#)

Liu, P.L., Xie, L.L., Li, P.W., Mao, J.F., Liu, H., Gao, S.M., Shi, P.H., and Gong, J.Q. (2016). Duplication and Divergence of Leucine-Rich Repeat Receptor-Like Protein Kinase (LRR-RLK) Genes in Basal Angiosperm *Amborella trichopoda*. *Front Plant Sci* 7, 1952.

Pubmed: [Author and Title](#)

Google Scholar: [Author Only Title Only Author and Title](#)

Lori, M., van Verk, M.C., Handers, T., Schatowitz, H., Klauser, D., Flury, P., Gehring, C.A., Boller, T., and Bartels, S. (2015). Evolutionary divergence of the plant elicitor peptides (Peps) and their receptors: interfamily incompatibility of perception but compatibility of downstream signalling. *Journal of experimental botany* 66, 5315-5325.

Pubmed: [Author and Title](#)

Google Scholar: [Author Only Title Only Author and Title](#)

Luo, M., Dennis, E.S., Berger, F., Peacock, W.J., and Chaudhury, A. (2005). MINISEED3 (MINI3), a WRKY family gene, and HAIKU2 (IKU2),

**a leucine-rich repeat (LRR) KINASE gene, are regulators of seed size in Arabidopsis. Proc Natl Acad Sci U S A 102, 17531-17536.**

Pubmed: [Author and Title](#)

Google Scholar: [Author Only Title Only Author and Title](#)

**Ma, X., Xu, G., He, P., and Shan, L. (2016). SERKing Coreceptors for Receptors. Trends Plant Sci 21, 1017-1033.**

Pubmed: [Author and Title](#)

Google Scholar: [Author Only Title Only Author and Title](#)

**Matsubayashi, Y., Hanai, H., Hara, O., and Sakagami, Y. (1996). Active fragments and analogs of the plant growth factor, phytosulfokine: structure-activity relationships. Biochemical & Biophysical Research Communications 225, 209-214.**

Pubmed: [Author and Title](#)

Google Scholar: [Author Only Title Only Author and Title](#)

**Matsubayashi, Y., Ogawa, M., Morita, A., and Sakagami, Y. (2002). An LRR receptor kinase involved in perception of a peptide plant hormone, phytosulfokine. Science 296, 1470-1472.**

Pubmed: [Author and Title](#)

Google Scholar: [Author Only Title Only Author and Title](#)

**Matsubayashi, Y., and Sakagami, Y. (1996). Phytosulfokine, sulfated peptides that induce the proliferation of single mesophyll cells of Asparagus officinalis L. Proc Natl Acad Sci U S A 93, 7623-7627.**

Pubmed: [Author and Title](#)

Google Scholar: [Author Only Title Only Author and Title](#)

**Matt, G., and Umen, J. (2016). Volvox: A simple algal model for embryogenesis, morphogenesis and cellular differentiation. Developmental biology 419, 99-113.**

Pubmed: [Author and Title](#)

Google Scholar: [Author Only Title Only Author and Title](#)

**Muschiatti, J.P., and Wengier, D.L. (2018). How many receptor-like kinases are required to operate a pollen tube. Curr Opin Plant Biol 41, 73-82.**

Pubmed: [Author and Title](#)

Google Scholar: [Author Only Title Only Author and Title](#)

**Myllyharju, J. (2003). Prolyl 4-hydroxylases, the key enzymes of collagen biosynthesis. Matrix Biol 22, 15-24.**

Pubmed: [Author and Title](#)

Google Scholar: [Author Only Title Only Author and Title](#)

**Nishiyama, T., Sakayama, H., de Vries, J., Buschmann, H., Saint-Marcoux, D., Ullrich, K.K., Haas, F.B., Vanderstraeten, L., Becker, D., Lang, D., et al. (2018). The Chara Genome: Secondary Complexity and Implications for Plant Terrestrialization. Cell 174, 448-464.e424.**

Pubmed: [Author and Title](#)

Google Scholar: [Author Only Title Only Author and Title](#)

**Nystedt, B., Street, N.R., Wetterbom, A., Zuccolo, A., Lin, Y.C., Scofield, D.G., Vezzi, F., Delhomme, N., Giacomello, S., Alexeyenko, A., et al. (2013). The Norway spruce genome sequence and conifer genome evolution. Nature 497, 579-584.**

Pubmed: [Author and Title](#)

Google Scholar: [Author Only Title Only Author and Title](#)

**Oelkers, K., Goffard, N., Weiller, G., Gresshoff, P., Mathesius, U., and Frickey, T. (2008). Bioinformatic analysis of the CLE signaling peptide family. BMC Plant Biology 8, 1.**

Pubmed: [Author and Title](#)

Google Scholar: [Author Only Title Only Author and Title](#)

**Ogawa-Ohnishi, M., Matsushita, W., and Matsubayashi, Y. (2013). Identification of three hydroxyproline O-arabinosyltransferases in Arabidopsis thaliana. Nat Chem Biol 9, 726-730.**

Pubmed: [Author and Title](#)

Google Scholar: [Author Only Title Only Author and Title](#)

**Oh, E., Seo, P.J., and Kim, J. (2018). Signaling Peptides and Receptors Coordinating Plant Root Development. Trends Plant Sci 23, 337-351.**

Pubmed: [Author and Title](#)

Google Scholar: [Author Only Title Only Author and Title](#)

**Okuda, S., Fujita, S., Moretti, A., Hohmann, U., Doblas, V.G., Ma, Y., Pfister, A., Brandt, B., Geldner, N., and Hothorn, M. (2020). Molecular mechanism for the recognition of sequence-divergent CIF peptides by the plant receptor kinases GSO1/SGN3 and GSO2. Proc Natl Acad Sci U S A 117, 2693-2703.**

Pubmed: [Author and Title](#)

Google Scholar: [Author Only Title Only Author and Title](#)

**Olsson, V., Joos, L., Zhu, S., Gevaert, K., Butenko, M.A., and De Smet, I. (2019). Look Closely, the Beautiful May Be Small: Precursor-Derived Peptides in Plants. Annu Rev Plant Biol 70, 153-186.**

Pubmed: [Author and Title](#)

Google Scholar: [Author Only Title Only Author and Title](#)

**Orr, R.J.S., and Aalen, R.B. (2017). In Silico Prediction of Ligand-Binding Sites of Plant Receptor Kinases Using Conservation Mapping. Methods Mol Biol 1621, 93-105.**



Pubmed: [Author and Title](#)

Google Scholar: [Author Only Title Only Author and Title](#)

**Pearce, G., Strydom, D., Johnson, S., and Ryan, C.A. (1991). A Polypeptide from Tomato Leaves Induces Wound-Inducible Proteinase Inhibitor Proteins. *Science* 253, 895-897.**

Pubmed: [Author and Title](#)

Google Scholar: [Author Only Title Only Author and Title](#)

**Peterson, K.M., Rychel, A.L., and Torii, K.U. (2010). Out of the Mouths of Plants: The Molecular Basis of the Evolution and Diversity of Stomatal Development. *Plant Cell* 22, 296-306.**

Pubmed: [Author and Title](#)

Google Scholar: [Author Only Title Only Author and Title](#)

**Qian, P., Song, W., Yokoo, T., Minobe, A., Wang, G., Ishida, T., Sawa, S., Chai, J., and Kakimoto, T. (2018). The CLE9/10 secretory peptide regulates stomatal and vascular development through distinct receptors. *Nature plants* 4, 1071-1081.**

Pubmed: [Author and Title](#)

Google Scholar: [Author Only Title Only Author and Title](#)

**Rensing, S.A., Lang, D., Zimmer, A.D., Terry, A., Salamov, A., Shapiro, H., Nishiyama, T., Perroud, P.F., Lindquist, E.A., Kamisugi, Y., et al. (2008). The *Physcomitrella* genome reveals evolutionary insights into the conquest of land by plants. *Science* 319, 64-69.**

Pubmed: [Author and Title](#)

Google Scholar: [Author Only Title Only Author and Title](#)

**Safaeizadeh, M., and Boller, T. (2019). Differential and tissue-specific activation pattern of the *AtPROPEP* and *AtPEPR* genes in response to biotic and abiotic stress in *Arabidopsis thaliana*. *Plant Signal Behav* 14, e1590094.**

Pubmed: [Author and Title](#)

Google Scholar: [Author Only Title Only Author and Title](#)

**Salomé, P.A., and Merchant, S.S. (2019). A Series of Fortunate Events: Introducing *Chlamydomonas* as a Reference Organism. *The Plant cell* 31, 1682-1707.**

Pubmed: [Author and Title](#)

Google Scholar: [Author Only Title Only Author and Title](#)

**San-Bento, R., Farcot, E., Galletti, R., Creff, A., and Ingram, G. (2014). Epidermal identity is maintained by cell-cell communication via a universally active feedback loop in *Arabidopsis thaliana*. *Plant J* 77, 46-58.**

Pubmed: [Author and Title](#)

Google Scholar: [Author Only Title Only Author and Title](#)

**Santiago, J., Brandt, B., Wildhagen, M., Hohmann, U., Hothorn, L.A., Butenko, M.A., and Hothorn, M. (2016). Mechanistic insight into a peptide hormone signaling complex mediating floral organ abscission. *eLife* 5, e15075.**

Pubmed: [Author and Title](#)

Google Scholar: [Author Only Title Only Author and Title](#)

**Segonzac, C., and Monaghan, J. (2019). Modulation of plant innate immune signaling by small peptides. *Curr Opin Plant Biol* 51, 22-28.**

Pubmed: [Author and Title](#)

Google Scholar: [Author Only Title Only Author and Title](#)

**Shi, C.-L., Aling, R.M., Hammerstad, M., and Aalen, R.B. (2019). Control of Organ Abscission and Other Cell Separation Processes by Evolutionary Conserved Peptide Signaling. *Plants (Basel, Switzerland)* 8, 225.**

Pubmed: [Author and Title](#)

Google Scholar: [Author Only Title Only Author and Title](#)

**Shi, C.-L., von Wangenheim, D., Herrmann, U., Wildhagen, M., Kulik, I., Kopf, A., Ishida, T., Olsson, V., Anker, M.K., Albert, M., et al. (2018). The dynamics of root cap sloughing in *Arabidopsis* is regulated by peptide signalling. *Nature Plants* 4, 596-604.**

Pubmed: [Author and Title](#)

Google Scholar: [Author Only Title Only Author and Title](#)

**Shinohara, H., Mori, A., Yasue, N., Sumida, K., and Matsubayashi, Y. (2016). Identification of three LRR-RKs involved in perception of root meristem growth factor in *Arabidopsis*. *Proceedings of the National Academy of Sciences of the United States of America* 113, 3897-3902.**

Pubmed: [Author and Title](#)

Google Scholar: [Author Only Title Only Author and Title](#)

**Shiu, S.H., and Bleecker, A.B. (2001). Receptor-like kinases from *Arabidopsis* form a monophyletic gene family related to animal receptor kinases. *Proc Natl Acad Sci U S A* 98, 10763-10768.**

Pubmed: [Author and Title](#)

Google Scholar: [Author Only Title Only Author and Title](#)

**Soltis, D.E., Albert, V.A., Leebens-Mack, J., Palmer, J.D., Wing, R.A., dePamphilis, C.W., Ma, H., Carlson, J.E., Altman, N., Kim, S., et al. (2008). The *Amborella* genome: an evolutionary reference for plant biology. *Genome Biology* 9, 402.**

Pubmed: [Author and Title](#)

Google Scholar: [Author Only Title Only Author and Title](#)

**Song, W., Liu, L., Wang, J., Wu, Z., Zhang, H., Tang, J., Lin, G., Wang, Y., Wen, X., Li, W., et al. (2016). Signature motif-guided identification of receptors for peptide hormones essential for root meristem growth. *Cell Res* 26, 674-685.**



Pubmed: [Author and Title](#)

Google Scholar: [Author Only Title Only Author and Title](#)

**Stemmans, P., Herisse, A.L., Melvin, J., Miller, M.A, Paris, F., Verniers, J., and Wellman, C.H. (2009). Origin and radiation of the earliest vascular land plants. *Science* 324, 353.**

Pubmed: [Author and Title](#)

Google Scholar: [Author Only Title Only Author and Title](#)

**Stührwoldt, N., and Schaller, A. (2019). Regulation of plant peptide hormones and growth factors by post-translational modification. *Plant Biol (Stuttg)* 21 Suppl 1, 49-63.**

Pubmed: [Author and Title](#)

Google Scholar: [Author Only Title Only Author and Title](#)

**Stø, I.M., Orr, R.J.S., Fooyontphanich, K., Jin, X., Knutsen, J.M.B., Fischer, U., Tranbarger, T.J., Nordal, I., and Aalen, R.B. (2015). Conservation of the abscission signaling peptide IDA during Angiosperm evolution: withstanding genome duplications and gain and loss of the receptors HAE/HSL2. *Frontiers in Plant Science* 6.**

Pubmed: [Author and Title](#)

Google Scholar: [Author Only Title Only Author and Title](#)

**Taleski, M., Imin, N., and Djordjevic, M.A (2018). CEP peptide hormones: key players in orchestrating nitrogen-demand signalling, root nodulation, and lateral root development. *Journal of experimental botany* 69, 1829-1836.**

Pubmed: [Author and Title](#)

Google Scholar: [Author Only Title Only Author and Title](#)

**Tang, J., Han, Z., Sun, Y., Zhang, H., Gong, X., and Chai, J. (2015). Structural basis for recognition of an endogenous peptide by the plant receptor kinase PEPR1. *Cell Res* 25, 110-120.**

Pubmed: [Author and Title](#)

Google Scholar: [Author Only Title Only Author and Title](#)

**Tavormina, P., De Coninck, B., Nikonorova, N., De Smet, I., and Cammue, B.P.A (2015). The Plant Peptidome: An Expanding Repertoire of Structural Features and Biological Functions. *The Plant cell* 27, 2095-2118.**

Pubmed: [Author and Title](#)

Google Scholar: [Author Only Title Only Author and Title](#)

**Tsuwamoto, R., Fukuoka, H., and Takahata, Y. (2008). GASSHO1 and GASSHO2 encoding a putative leucine-rich repeat transmembrane-type receptor kinase are essential for the normal development of the epidermal surface in Arabidopsis embryos. *Plant J* 54, 30-42.**

Pubmed: [Author and Title](#)

Google Scholar: [Author Only Title Only Author and Title](#)

**Vie, A.K., Najafi, J., Liu, B., Winge, P., Butenko, M.A, Hornslien, K.S., Kumpf, R., Aalen, R.B., Bones, A.M., and Brembu, T. (2015). The IDA/IDA-LIKE and PIP/PIP-LIKE gene families in Arabidopsis: phylogenetic relationship, expression patterns, and transcriptional effect of the PIPL3 peptide. *Journal of Experimental Botany* 66, 5351-5365.**

Pubmed: [Author and Title](#)

Google Scholar: [Author Only Title Only Author and Title](#)

**Whitewoods, C.D., Cammarata, J., Nemec Venza, Z., Sang, S., Crook, A.D., Aoyama, T., Wang, X.Y., Waller, M., Kamisugi, Y., Cuming, A.C., et al. (2018). CLAVATA Was a Genetic Novelty for the Morphological Innovation of 3D Growth in Land Plants. *Current biology : CB* 28, 2365-2376.e2365.**

Pubmed: [Author and Title](#)

Google Scholar: [Author Only Title Only Author and Title](#)

**Worden, A.Z., Lee, J.H., Mock, T., Rouze, P., Simmons, M.P., Aerts, A.L., Allen, A.E., Cuvelier, M.L., Derelle, E., Everett, M.V., et al. (2009). Green evolution and dynamic adaptations revealed by genomes of the marine picoeukaryotes *Micromonas*. *Science* 324, 268-272.**

Pubmed: [Author and Title](#)

Google Scholar: [Author Only Title Only Author and Title](#)

**Wu, H., Zheng, R., Hao, Z., Meng, Y., Weng, Y., Zhou, X., Zhu, L., Hu, X., Wang, G., Shi, J., et al. (2019). *Cunninghamia lanceolata* PSK Peptide Hormone Genes Promote Primary Root Growth and Adventitious Root Formation. *Plants (Basel, Switzerland)* 8.**

Pubmed: [Author and Title](#)

Google Scholar: [Author Only Title Only Author and Title](#)

**Yamaguchi, Y.L., Ishida, T., and Sawa, S. (2016). CLE peptides and their signaling pathways in plant development. *J Exp Bot* 67, 4813-4826.**

Pubmed: [Author and Title](#)

Google Scholar: [Author Only Title Only Author and Title](#)

**Yokota, T., Ohnishi, T., Shibata, K., Asahina, M., Nomura, T., Fujita, T., Ishizaki, K., and Kohchi, T. (2017). Occurrence of brassinosteroids in non-flowering land plants, liverwort, moss, lycophyte and fern. *Phytochemistry* 136, 46-55.**

Pubmed: [Author and Title](#)

Google Scholar: [Author Only Title Only Author and Title](#)

**Zhang, H., Han, Z., Song, W., and Chai, J. (2016). Structural Insight into Recognition of Plant Peptide Hormones by Receptors. *Mol Plant* 9, 1454-1463.**

Pubmed: [Author and Title](#)

Google Scholar: [Author Only](#) [Title Only](#) [Author and Title](#)

**Zhao, Q., Nakashima, J., Chen, F., Yin, Y., Fu, C., Yun, J., Shao, H., Wang, X., Wang, ZY., and Dixon, R.A (2013). Laccase is necessary and nonredundant with peroxidase for lignin polymerization during vascular development in Arabidopsis. Plant Cell 25, 3976-3987.**

Pubmed: [Author and Title](#)

Google Scholar: [Author Only](#) [Title Only](#) [Author and Title](#)
